# Supplementary material for: Enhanced stability in perovskite solar cells via room-temperature processing
Source: Royal Society of Chemistry journal article supplement (doi:10.1039/d1tc02357h), 2021-01-01
Supplement: d1tc02357h1.pdf [file d1tc02357h1.pdf]

SI

## **Enhanced stability in perovskite solar cells via room-temperature processing†**

Boxin Wang,<sup>ab</sup> Shiqing Bi,<sup>\*ac</sup> Jiyu Zhou,<sup>d</sup> Nafees Ahmad,<sup>ab</sup> Dongyang Zhang,<sup>d</sup> Yuan Zhang,<sup>d</sup> Huiqiong Zhou<sup>\*ab</sup>

a.CAS Key Laboratory of Nanosystem and Hierarchical Fabrication, National Center for Nanoscience and Technology, Beijing 100190, China. E-mail: zhouhq@nanoctr.cn

b.Center of Materials Science and Optoelectronics Engineering, University of Chinese Academy of Sciences, Beijing 100049, China

c.School of Chemistry and Chemical Engineering, Yulin University, Shaanxi Province, Yulin 719000, P. R. China.

d.School of Chemistry, Beijing Advanced Innovation Center for Biomedical Engineering, Beihang University, Beijing 100191, P. R. China.

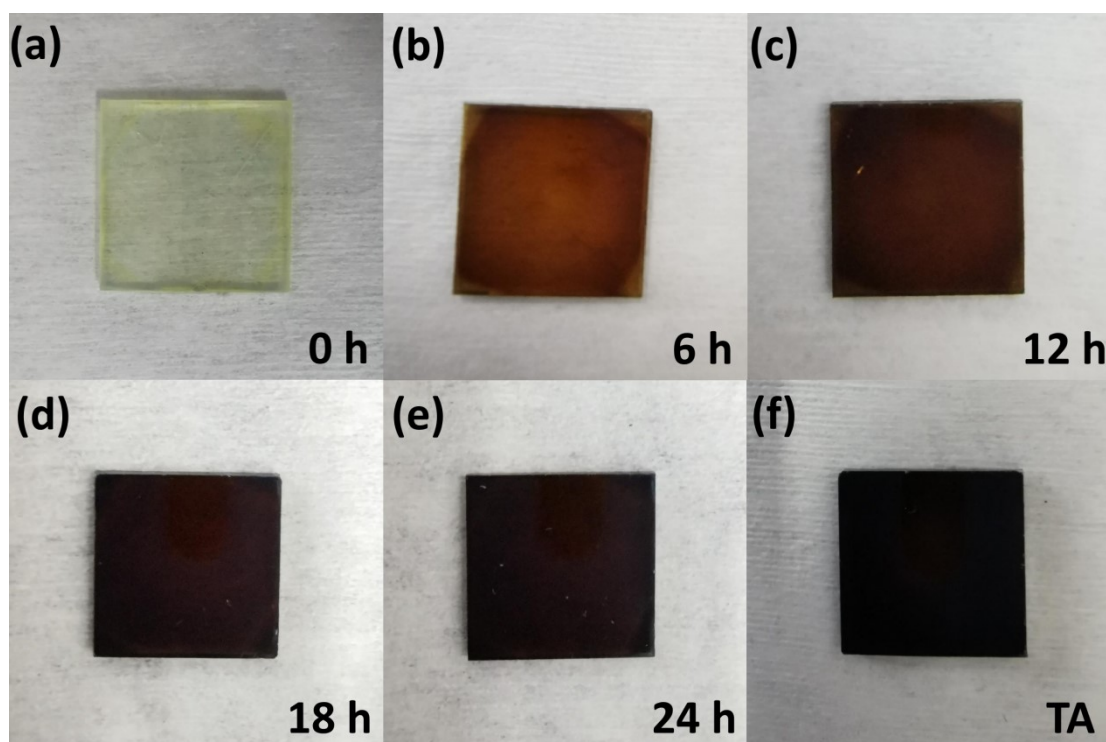

**Figure S1.** The colour difference between the TA and RT processed films. (a) - (d) The perovskite film crystallized for different times (0, 6, 12, 18 and 24 hours). (f) The control sample crystallized by thermal annealing.

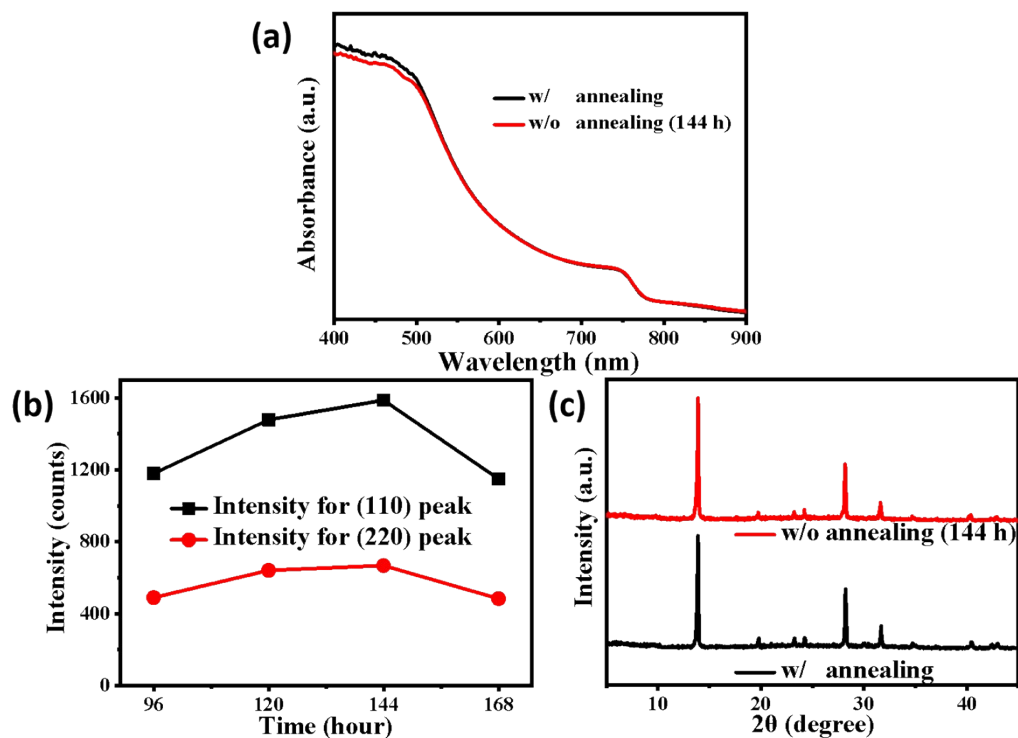

**Figure S2.** (a) UV-Vis spectra of perovskite films crystallized at room temperature for 144 hours and control sample crystallized by thermal annealing inside a N<sub>2</sub> filled glovebox. (b) Peak intensity of (110) and (220) planes of the perovskite film crystallized for different times (96, 120, 144 and 168 hours). (c) XRD of perovskite films crystallized at room temperature for 144 hours and control sample crystallized by thermal annealing inside a N<sub>2</sub> filled glovebox.

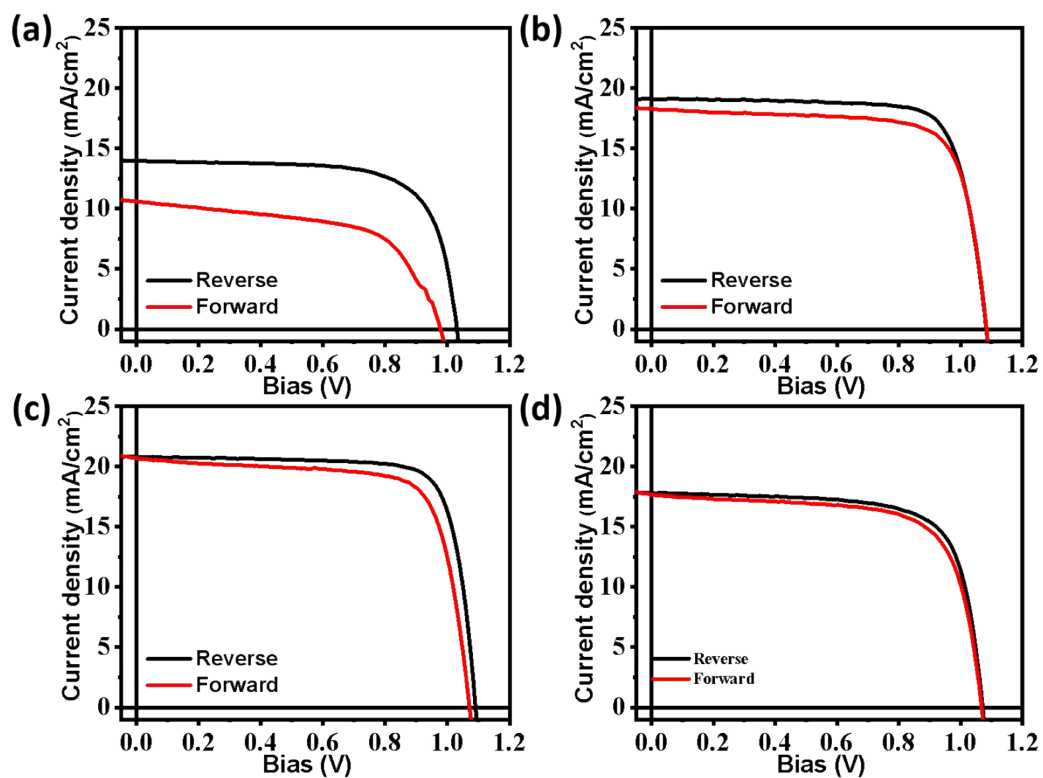

**Figure S3.** Comparison of the hysteresis effect in J-V characteristics of MAPbI<sub>3</sub> solar cells under 1 sun irradiation in the forward (F) and reverse (R) scan directions that made from perovskite films crystallized for (a) 96, (b) 120, (c) 144 and (d) 168 hours without thermal annealing.

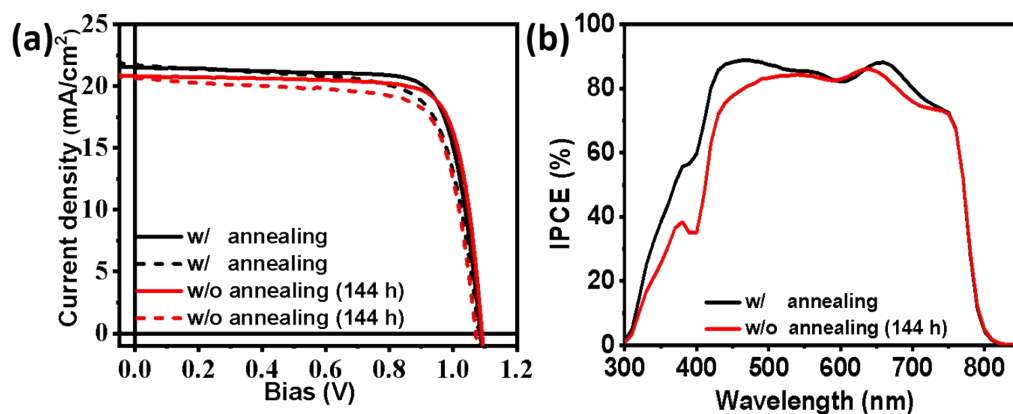

Figure S4. (a) Comparison of the hysteresis effect in J-V characteristics of MAPbI<sub>3</sub> solar cells under 1 sun irradiation in the forward (F) and reverse (R) scan directions and (b) EQE spectra that made from perovskite films crystallized for 144 hours without and with thermal annealing.

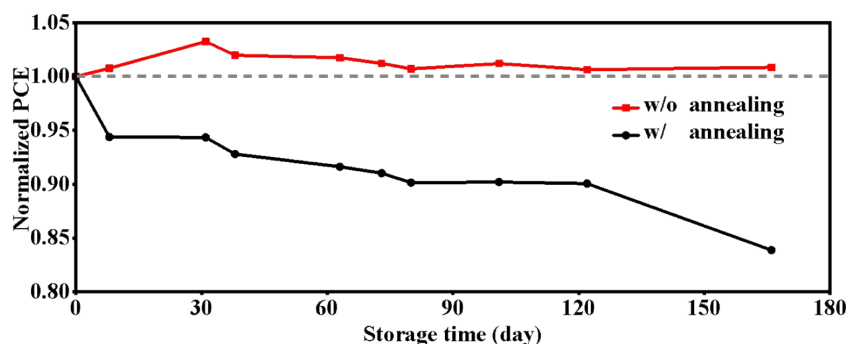

Figure S5. Shelf time of the solar cells obtained from 144 hours crystallized perovskite films and thermal annealing samples.

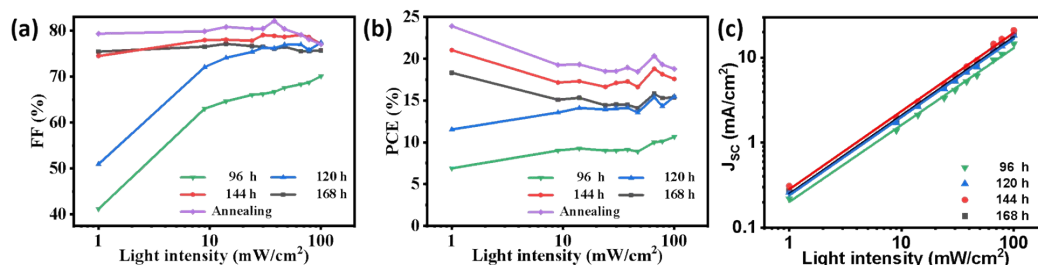

Figure S6. Irradiation dependent of (a) fill factor ( FF ), (b) PCE and (c) short-circuit current  $J_{sc}$  of MAPbI<sub>3</sub> solar cells that made from perovskite films crystallized for 96, 120, 144 and 168 h with room-temperature processing and theamal annealing.

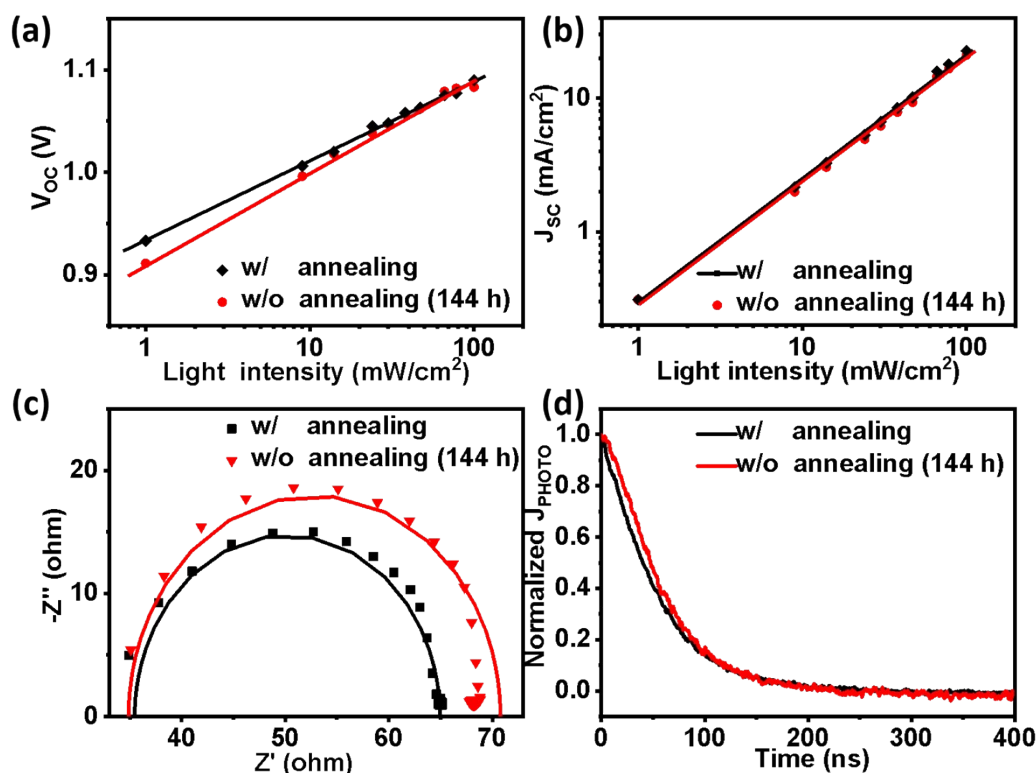

Figure S7. Irradiation dependent (a) open-circuit voltage and (b) short-circuit current  $J_{sc}$  of MAPbI<sub>3</sub> solar cells that made from perovskite films crystallized for 144 h without thermal annealing and with annealing. (c) Nyquist plot of the impedance measured on the same solar

cells under 1 sun irradiation (bias at  $V_{oc}$ ). Lines are the results of equivalent circuit modelling. (d) TPC of perovskite solar cells with crystallized for 144 h without thermal annealing and with annealing.

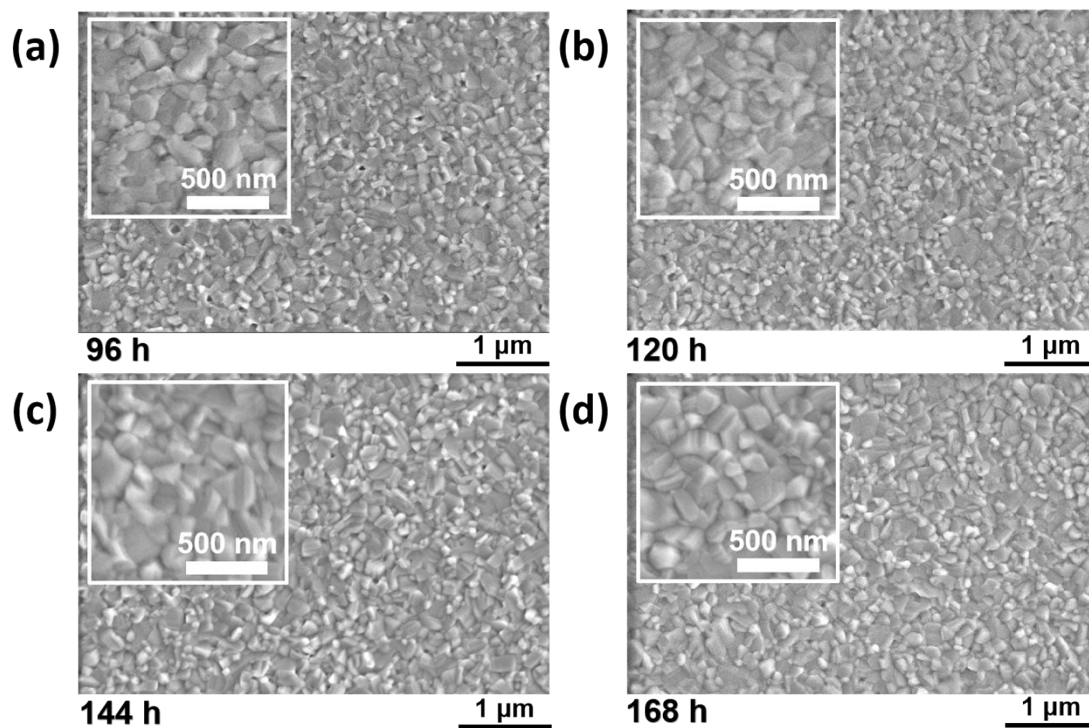

Figure S8. SEM images (a - d) of the perovskite films crystallized for 96, 120, 144 and 168 hours without thermal annealing.

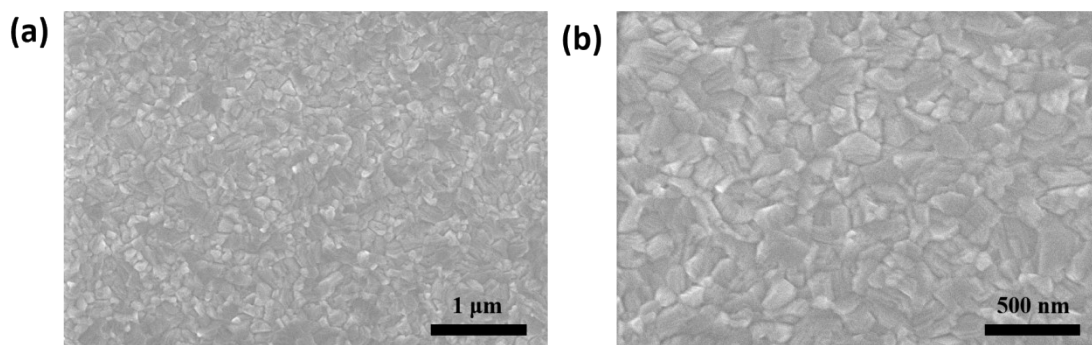

Figure S9. SEM image of the perovskite films by thermal annealing.

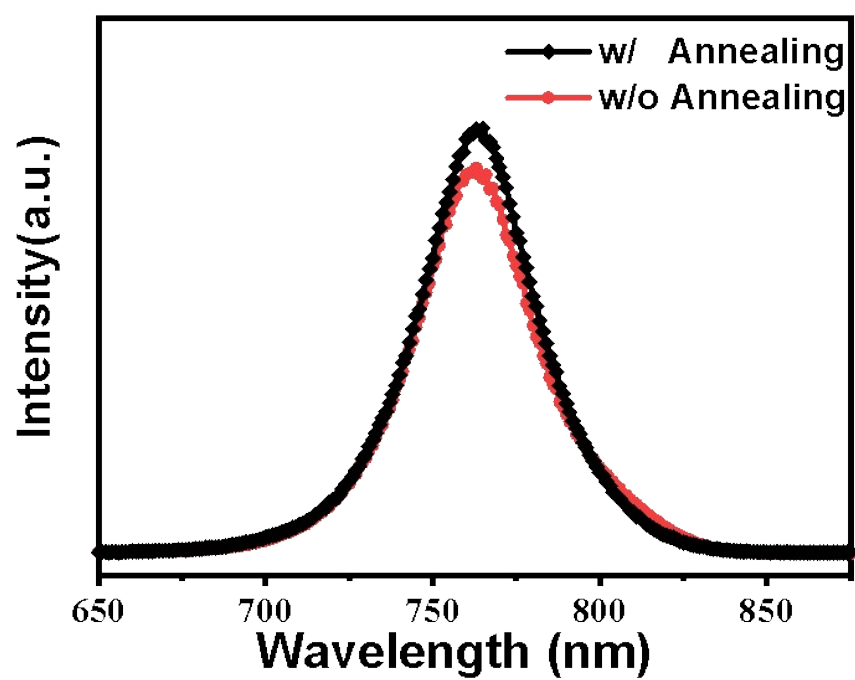

Figure S10. Photoluminescence (PL) spectroscopy of the perovskite films with crystallized for 144 h without thermal annealing and with annealing.



**Table S1.** Comparison of the hysteresis effect in J-V characteristics of MAPbI<sub>3</sub> solar cells under 1 sun irradiation in the forward (F) and reverse (R) scan directions that made from perovskite films crystallized for (a) 96, (b)120, (c)144 and (d) 168 hours without thermal annealing.

| Time      |   | V <sub>oc</sub> (V) | J <sub>sc</sub> / (mA·cm <sup>-2</sup> ) | FF (%) | PCE (%) |
|-----------|---|---------------------|------------------------------------------|--------|---------|
| 96 h      | R | 1.03                | 13.95                                    | 71.56  | 10.28   |
|           | F | 0.97                | 10.56                                    | 59.28  | 6.07    |
| 120 h     | R | 1.08                | 19.09                                    | 77.59  | 16.00   |
|           | F | 1.08                | 18.27                                    | 75.26  | 14.85   |
| 144 h     | R | 1.09                | 20.76                                    | 79.75  | 18.05   |
|           | F | 1.07                | 20.64                                    | 74.28  | 16.40   |
| 168 h     | R | 1.07                | 17.79                                    | 72.86  | 13.87   |
|           | F | 1.06                | 17.64                                    | 70.84  | 13.25   |
| Annealing | R | 1.08                | 21.66                                    | 79.71  | 18.65   |
|           | F | 1.08                | 21.52                                    | 74.97  | 17.42   |

**Table S2.** Device parameters of impedance spectroscopy and TPC of MAPbI<sub>3</sub> solar cells measured.

|           | R <sub>1</sub> (Ω) | C <sub>1</sub> (C) | R <sub>2</sub> (Ω) | τ (ns)       |
|-----------|--------------------|--------------------|--------------------|--------------|
| 96 h      | 32.11              | 9.251E-9           | 69.72              | 94.02 ± 0.57 |
| 120 h     | 33.69              | 9.417E-9           | 47.87              | 70.83 ± 0.38 |
| 144 h     | 34.88              | 1.420E-8           | 35.89              | 55.72 ± 0.24 |
| 168 h     | 33.41              | 9.046E-9           | 57.52              | 76.33 ± 0.49 |
| Annealing | 35.47              | 1.636E-8           | 29.46              | 53.36 ± 0.12 |
